# Supplementary material
Source: PubMed Central journal article supplement (PMC4154478)
Supplement: NIHMS366326-supplement-02.pdf [file NIHMS366326-supplement-02.pdf]

AC

| <b>Supplementary Table 1. Comparison of Participants With and Without Erosive Esophagitis</b> |                                        |                                           |                |
|-----------------------------------------------------------------------------------------------|----------------------------------------|-------------------------------------------|----------------|
| <b>Characteristics</b>                                                                        | <b>Erosive Esophagitis<br/>(n=143)</b> | <b>No Erosive Esophagitis<br/>(n=278)</b> | <b>p-value</b> |

|                              | Mean $\pm$ SD or n (%) |                |        |
|------------------------------|------------------------|----------------|--------|
| Age, years                   | 56.2 $\pm$ 9.6         | 55.6 $\pm$ 9.5 | 0.548  |
| Male                         | 83 (58)                | 98 (35)        | <0.001 |
| White                        | 120 (84)               | 236 (86)       | 0.666  |
| BMI, kg/m <sup>2</sup>       | 28.9 $\pm$ 6.0         | 27.7 $\pm$ 6.0 | 0.053  |
| Alcohol use                  | 101 (71)               | 194 (70)       | 0.859  |
| History of tobacco use       | 80 (56)                | 135 (49)       | 0.172  |
| Reflux Symptom Index         | 7.7 $\pm$ 7.8          | 7.4 $\pm$ 7.2  | 0.682  |
| GERD Health Related QoL      | 7.4 $\pm$ 7.4          | 5.8 $\pm$ 7.2  | 0.039  |
| Proton pump inhibitor (PPI)  | 53 (37)                | 130 (47)       | 0.112  |
| H2 receptor antagonist (H2A) | 30 (21)                | 74 (27)        | 0.197  |
| PPI or H2A                   | 59 (41)                | 147 (53)       | 0.024  |
| NSAID use                    | 47 (33)                | 100 (36)       | 0.527  |
| ASA use                      | 60 (42)                | 103 (37)       | 0.341  |
| Acid reflux                  | 82 (58)                | 156 (57)       | 0.750  |
| Heartburn                    | 95 (67)                | 149 (54)       | 0.010  |
| Dysphagia                    | 23 (16)                | 51 (18)        | 0.574  |
| Odynophagia                  | 7 (5)                  | 14 (5)         | 0.962  |
| Chest Pain                   | 24 (17)                | 55 (20)        | 0.176  |
| Hoarse                       | 32 (22)                | 75 (27)        | 0.228  |
| Sore throat                  | 13 (9)                 | 16 (6)         | 0.245  |
| Excess Mucus                 | 36 (25)                | 85 (21)        | 0.202  |
| Sinus                        | 21 (15)                | 33 (12)        | 0.260  |
| Hematemesis                  | 0 (0)                  | 1 (0)          | 0.293  |
| Globus                       | 25 (17)                | 60 (22)        | 0.232  |
| Weight loss                  | 4 (3)                  | 13 (5)         | 0.248  |

|                                                |         |         |       |
|------------------------------------------------|---------|---------|-------|
| Feeling of something in the back of the throat | 32 (22) | 51 (18) | 0.229 |
|------------------------------------------------|---------|---------|-------|

| <b>Supplementary Table 2. Comparison of Participants With Lower and Better Overall Tolerability</b> |                                               |                                                |                |
|-----------------------------------------------------------------------------------------------------|-----------------------------------------------|------------------------------------------------|----------------|
| <b>Characteristics</b>                                                                              | <b>Lower overall tolerability<br/>(n=114)</b> | <b>Better overall tolerability<br/>(n=312)</b> | <b>p-value</b> |
|                                                                                                     |                                               |                                                |                |

|                                                | Mean $\pm$ SD or n (%) |                |        |
|------------------------------------------------|------------------------|----------------|--------|
| Age, years                                     | 52.8 $\pm$ 8.8         | 56.9 $\pm$ 9.5 | <0.001 |
| Male                                           | 37 (33)                | 145 (46)       | 0.011  |
| White                                          | 95 (85)                | 264 (85)       | 0.959  |
| BMI, kg/m <sup>2</sup>                         | 27.2 $\pm$ 5.5         | 28.3 $\pm$ 6.2 | 0.112  |
| Alcohol use                                    | 84 (75)                | 214 (69)       | 0.218  |
| History of tobacco use                         | 59 (53)                | 158 (51)       | 0.711  |
| Reflux Symptom Index                           | 8.0 $\pm$ 8.1          | 7.2 $\pm$ 7.2  | 0.377  |
| GERD Health Related QoL                        | 6.8 $\pm$ 7.7          | 6.2 $\pm$ 7.2  | 0.486  |
| Acid reflux                                    | 62 (55)                | 178 (57)       | 0.706  |
| Heartburn                                      | 69 (61)                | 176 (56)       | 0.410  |
| Dysphagia                                      | 26 (23)                | 49 (16)        | 0.084  |
| Odynophagia                                    | 3 (3)                  | 18 (6)         | 0.199  |
| Chest Pain                                     | 25 (22)                | 55 (18)        | 0.602  |
| Hoarse                                         | 29 (26)                | 78 (25)        | 0.828  |
| Sore throat                                    | 6 (5)                  | 23 (7)         | 0.736  |
| Excess Mucus                                   | 30 (27)                | 91 (29)        | 0.702  |
| Sinus                                          | 15 (13)                | 39 (13)        | 0.813  |
| Hematemesis                                    | 0 (0)                  | 1 (0)          | 0.695  |
| Globus                                         | 28 (25)                | 58 (19)        | 0.299  |
| Weight loss                                    | 5 (4)                  | 12 (4)         | 0.806  |
| Feeling of something in the back of the throat | 22 (19)                | 61 (20)        | 0.834  |

Acronyms:

squamocolumnar junction (SCJ)

z-line appearance (ZAP)

hematoxylin and eosin (H&E)

ACCEPTED MANUSCRIPT
